# Supplementary material
Source: PubMed Central journal article supplement (PMC4187273)
Supplement: supp_nst148_scan-13-038-File007.pdf [file supp_nst148_scan-13-038-File007.pdf]

Supplemental Table 1.

|                                                           |       | P3            |              |               |              | early LPP     |              | LPP           |              | overall late positivity |              |
|-----------------------------------------------------------|-------|---------------|--------------|---------------|--------------|---------------|--------------|---------------|--------------|-------------------------|--------------|
|                                                           |       | 380-480ms     |              | 350-550ms     |              | 550-700ms     |              | 700-900ms     |              | 350-900ms               |              |
| Source                                                    | df    | F             | Sig.         | F             | Sig.         | F             | Sig.         | F             | Sig.         | F                       | Sig.         |
| cond                                                      | 1, 17 | 3.655         | 0.073        | 3.039         | 0.099        | 0.046         | 0.833        | 3.548         | 0.077        | 0.218                   | 0.647        |
| dur                                                       | 1, 17 | 4.255         | 0.055        | <b>8.269</b>  | <b>0.010</b> | <b>9.309</b>  | <b>0.007</b> | 0.354         | 0.560        | <b>5.682</b>            | <b>0.029</b> |
| stim                                                      | 1, 17 | <b>10.930</b> | <b>0.004</b> | <b>13.148</b> | <b>0.002</b> | <b>16.044</b> | <b>0.001</b> | <b>5.946</b>  | <b>0.026</b> | <b>22.121</b>           | <b>0.000</b> |
| ch                                                        | 3, 51 | <b>31.935</b> | <b>0.000</b> | <b>29.335</b> | <b>0.000</b> | <b>6.453</b>  | <b>0.001</b> | <b>31.928</b> | <b>0.000</b> | <b>5.435</b>            | <b>0.003</b> |
| cond * dur                                                | 1, 17 | 0.059         | 0.811        | 0.097         | 0.759        | 0.772         | 0.392        | 0.432         | 0.520        | 0.691                   | 0.417        |
| cond * stim                                               | 1, 17 | <b>35.652</b> | <b>0.000</b> | <b>65.145</b> | <b>0.000</b> | <b>24.263</b> | <b>0.000</b> | <b>8.624</b>  | <b>0.009</b> | <b>42.830</b>           | <b>0.000</b> |
| dur * stim                                                | 1, 17 | 0.000         | 0.995        | 0.058         | 0.813        | 2.226         | 0.154        | 0.577         | 0.458        | 0.846                   | 0.371        |
| cond * dur * stim                                         | 1, 17 | <b>5.736</b>  | <b>0.028</b> | <b>4.878</b>  | <b>0.041</b> | <b>5.523</b>  | <b>0.031</b> | <b>11.463</b> | <b>0.004</b> | <b>9.743</b>            | <b>0.006</b> |
| cond * ch                                                 | 3, 51 | <b>6.902</b>  | <b>0.001</b> | <b>9.338</b>  | <b>0.000</b> | <b>11.673</b> | <b>0.000</b> | 1.813         | 0.157        | <b>8.614</b>            | <b>0.000</b> |
| dur * ch                                                  | 3, 51 | <b>8.255</b>  | <b>0.000</b> | 0.974         | 0.412        | <b>64.103</b> | <b>0.000</b> | <b>10.080</b> | <b>0.000</b> | <b>23.755</b>           | <b>0.000</b> |
| cond * dur * ch                                           | 3, 51 | 1.749         | 0.169        | <b>3.215</b>  | <b>0.030</b> | 0.095         | 0.962        | 1.294         | 0.286        | 0.786                   | 0.507        |
| stim * ch                                                 | 3, 51 | <b>4.250</b>  | <b>0.009</b> | <b>5.512</b>  | <b>0.002</b> | <b>3.231</b>  | <b>0.030</b> | 2.111         | 0.110        | <b>3.694</b>            | <b>0.018</b> |
| cond * stim * ch                                          | 3, 51 | <b>6.686</b>  | <b>0.001</b> | <b>5.739</b>  | <b>0.002</b> | 2.094         | 0.113        | 0.750         | 0.527        | 1.133                   | 0.345        |
| dur * stim * ch                                           | 3, 51 | 0.491         | 0.690        | 0.597         | 0.620        | 2.238         | 0.095        | 0.504         | 0.681        | 0.784                   | 0.508        |
| cond * dur * stim * ch                                    | 3, 51 | <b>6.145</b>  | <b>0.001</b> | <b>3.952</b>  | <b>0.013</b> | 1.192         | 0.322        | <b>2.950</b>  | <b>0.041</b> | <b>4.146</b>            | <b>0.011</b> |
| Post-hoc test by each channel separately; Fz, Cz, Pz & Oz |       | P3            |              |               |              | early LPP     |              | LPP           |              | overall late positivity |              |
|                                                           |       | 380-480ms     |              | 350-550ms     |              | 550-700ms     |              | 700-900ms     |              | 350-900ms               |              |
| Source                                                    | df    | F             | Sig.         | F             | Sig.         | F             | Sig.         | F             | Sig.         | F                       | Sig.         |
| cond                                                      | 1, 17 | <b>7.027</b>  | <b>0.017</b> | <b>7.857</b>  | <b>0.012</b> | 3.871         | 0.066        | 0.059         | 0.811        | 2.000                   | 0.175        |
| dur                                                       | 1, 17 | 1.653         | 0.216        | <b>4.973</b>  | <b>0.040</b> | <b>21.765</b> | <b>0.000</b> | 2.800         | 0.113        | <b>16.236</b>           | <b>0.001</b> |
| stim                                                      | 1, 17 | 3.783         | 0.069        | 3.885         | 0.065        | 3.356         | 0.085        | 3.023         | 0.100        | <b>6.284</b>            | <b>0.023</b> |
| cond * dur                                                | 1, 17 | 0.019         | 0.893        | 0.007         | 0.934        | 0.299         | 0.592        | 0.100         | 0.756        | 0.004                   | 0.951        |
| cond * stim                                               | 1, 17 | <b>5.706</b>  | <b>0.029</b> | <b>10.584</b> | <b>0.005</b> | 3.823         | 0.067        | 3.482         | 0.079        | <b>8.181</b>            | <b>0.011</b> |
| dur * stim                                                | 1, 17 | 0.124         | 0.729        | 0.188         | 0.670        | 2.463         | 0.135        | 0.013         | 0.911        | 0.434                   | 0.519        |
| cond * dur * stim                                         | 1, 17 | <b>11.362</b> | <b>0.004</b> | <b>7.194</b>  | <b>0.016</b> | 3.859         | 0.066        | 9.517         | <b>0.007</b> | <b>10.186</b>           | <b>0.005</b> |
| Cz                                                        |       |               |              |               |              |               |              |               |              |                         |              |
| cond                                                      | 1, 17 | 3.759         | 0.069        | 3.136         | 0.095        | 0.234         | 0.635        | <b>5.363</b>  | <b>0.033</b> | 0.546                   | 0.470        |
| dur                                                       | 1, 17 | 0.622         | 0.441        | <b>11.766</b> | <b>0.003</b> | <b>32.395</b> | <b>0.000</b> | 1.621         | 0.220        | <b>26.470</b>           | <b>0.000</b> |
| stim                                                      | 1, 17 | <b>11.134</b> | <b>0.004</b> | <b>14.606</b> | <b>0.001</b> | <b>17.323</b> | <b>0.001</b> | <b>5.972</b>  | <b>0.026</b> | <b>19.749</b>           | <b>0.000</b> |
| cond * dur                                                | 1, 17 | 0.233         | 0.636        | 0.355         | 0.559        | 0.229         | 0.638        | 0.544         | 0.471        | 0.120                   | 0.734        |
| cond * stim                                               | 1, 17 | <b>28.982</b> | <b>0.000</b> | <b>58.396</b> | <b>0.000</b> | <b>17.997</b> | <b>0.001</b> | <b>8.179</b>  | <b>0.011</b> | <b>31.508</b>           | <b>0.000</b> |
| dur * stim                                                | 1, 17 | 0.064         | 0.803        | 0.351         | 0.561        | <b>4.715</b>  | <b>0.044</b> | 1.148         | 0.299        | 1.968                   | 0.179        |
| cond * dur * stim                                         | 1, 17 | <b>5.995</b>  | <b>0.025</b> | <b>5.054</b>  | <b>0.038</b> | <b>5.184</b>  | <b>0.036</b> | <b>10.262</b> | <b>0.005</b> | <b>8.844</b>            | <b>0.009</b> |
| Pz                                                        |       |               |              |               |              |               |              |               |              |                         |              |
| cond                                                      | 1, 17 | 2.251         | 0.152        | 1.137         | 0.301        | 2.688         | 0.119        | <b>12.785</b> | <b>0.002</b> | 2.921                   | 0.106        |
| dur                                                       | 1, 17 | 1.465         | 0.243        | 2.617         | 0.124        | <b>7.653</b>  | <b>0.013</b> | <b>7.635</b>  | <b>0.013</b> | 1.391                   | 0.255        |
| stim                                                      | 1, 17 | <b>18.227</b> | <b>0.001</b> | <b>22.875</b> | <b>0.000</b> | <b>26.511</b> | <b>0.000</b> | <b>9.813</b>  | <b>0.006</b> | <b>37.263</b>           | <b>0.000</b> |
| cond * dur                                                | 1, 17 | 0.043         | 0.839        | 0.100         | 0.756        | 1.800         | 0.197        | 3.930         | 0.064        | 2.992                   | 0.102        |
| cond * stim                                               | 1, 17 | <b>53.846</b> | <b>0.000</b> | <b>81.973</b> | <b>0.000</b> | <b>31.360</b> | <b>0.000</b> | <b>5.697</b>  | <b>0.029</b> | <b>42.337</b>           | <b>0.000</b> |
| dur * stim                                                | 1, 17 | 0.015         | 0.904        | 0.024         | 0.878        | 1.303         | 0.269        | 1.744         | 0.204        | 0.923                   | 0.350        |
| cond * dur * stim                                         | 1, 17 | 1.584         | 0.225        | 2.085         | 0.167        | <b>5.159</b>  | <b>0.036</b> | <b>8.836</b>  | <b>0.009</b> | <b>6.986</b>            | <b>0.017</b> |
| Oz                                                        |       |               |              |               |              |               |              |               |              |                         |              |
| cond                                                      | 1, 17 | 0.143         | 0.710        | 0.001         | 0.974        | 3.267         | 0.088        | <b>7.823</b>  | <b>0.012</b> | 3.179                   | 0.092        |
| dur                                                       | 1, 17 | <b>10.820</b> | <b>0.004</b> | 4.310         | 0.053        | <b>5.410</b>  | <b>0.033</b> | <b>20.393</b> | <b>0.000</b> | 4.316                   | 0.053        |
| stim                                                      | 1, 17 | <b>5.605</b>  | <b>0.030</b> | <b>7.299</b>  | <b>0.015</b> | <b>7.228</b>  | <b>0.016</b> | 3.767         | 0.069        | <b>9.592</b>            | <b>0.007</b> |
| cond * dur                                                | 1, 17 | 2.197         | 0.157        | <b>4.865</b>  | <b>0.041</b> | 3.367         | 0.084        | 4.200         | 0.056        | <b>11.128</b>           | <b>0.004</b> |
| cond * stim                                               | 1, 17 | <b>35.540</b> | <b>0.000</b> | <b>47.039</b> | <b>0.000</b> | <b>19.006</b> | <b>0.000</b> | 1.842         | 0.192        | <b>16.048</b>           | <b>0.001</b> |
| dur * stim                                                | 1, 17 | 0.773         | 0.392        | 0.547         | 0.470        | 0.002         | 0.963        | 0.269         | 0.611        | 0.000                   | 0.988        |
| cond * dur * stim                                         | 1, 17 | 0.851         | 0.369        | 1.983         | 0.177        | <b>5.147</b>  | <b>0.037</b> | <b>12.366</b> | <b>0.003</b> | <b>7.396</b>            | <b>0.015</b> |

cond: condition (Pain Judging Condition or Counting Condition), dur: stimulus duration (200ms or 500ms), stim; stimulus type (Painful stimulus or Neutral stimulus), ch: Channel location (Fz, Cz, Pz and Oz).
