# Supplementary material
Source: PubMed Central journal article supplement (PMC4187273)

Supplemental Figure 2.  
Sample waveform for explaining the time epochs we applied in this paper.

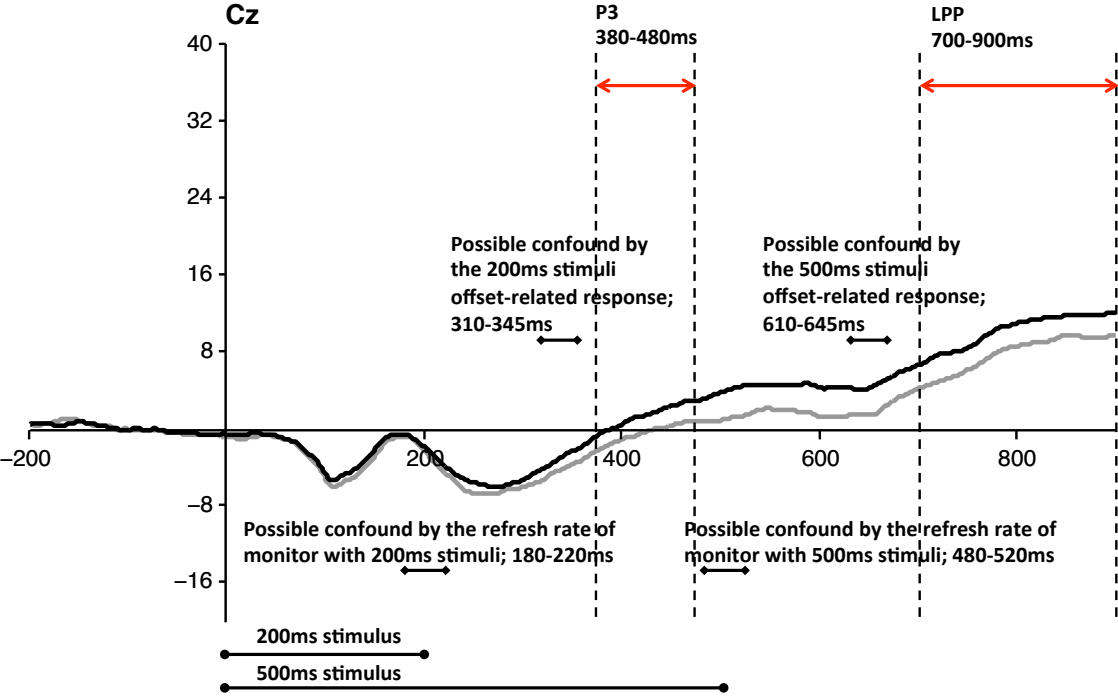

Supplement: supp_nst148_scan-13-038-File010.pdf [file supp_nst148_scan-13-038-File010.pdf]
